# Supplementary material
Source: PubMed Central journal article supplement (PMC6765205)
Supplement: Supp_Data1.pdf [file Supp_Data1.pdf]

## Supplementary Data

### eExhibit 1: Cohort Study Survey Items

#### *Food insecurity*

I'm going to read you two statements that people have made about their food situation. For these statements, please tell me whether the statement was often true, sometimes true, or never true for you in the last 1 month.

The first statement is, "The food that I bought just didn't last, and I didn't have money to get more."

Was that often, sometimes, or never true for you in the last month?

The second statement is "I couldn't afford to eat balanced meals." Was that often, sometimes, or never true for you in the last month?

In the last month, did you ever cut the size of your meals or skip meals because there wasn't enough money for food?

How often did this happen—almost every day, some days but not every day, or in only 1 or 2 days?

In the last month, did you ever eat less than you felt you should because there wasn't enough money for food?

In the last month, were you ever hungry but didn't eat because there wasn't enough money for food?

Scoring: 2 or more 'affirmative' (often true, sometimes true, or 'yes') responses were scored as food insecure

Source: <https://www.ers.usda.gov/media/8279/ad2012.pdf>

#### *Cost-related medication underuse*

DURING THE PAST 1 MONTH, was there any time when you needed prescription medicines but didn't get it because you couldn't afford it?

Yes  No  Don't Know

DURING THE PAST 1 MONTH, did you skip medication to save money?

Yes  No  Don't Know

DURING THE PAST 1 MONTH, did you take less medicine to save money?

Yes  No  Don't Know

DURING THE PAST 1 MONTH, did you delay filling a prescription to save money?

Yes  No  Don't Know

Scoring: "yes" response to any item indicates cost-related medication underuse

Source: [ftp://ftp.cdc.gov/pub/Health\\_Statistics/NCHS/Survey\\_Questionnaires/NHIS/2014/English/qadult.pdf](ftp://ftp.cdc.gov/pub/Health_Statistics/NCHS/Survey_Questionnaires/NHIS/2014/English/qadult.pdf)

#### *Transportation barriers*

During the past month, how often have you missed appointments with the doctor because of problems with transportation?

Often  Sometimes  Never  Don't know

Scoring: "often" or "sometimes" was categorized as having a transportation barrier

Source: Syed et al.<sup>S1</sup>

### eExhibit 2: Abstraction Form for Qualitative Analysis

[see separate pdf]

### Supplementary Reference

- S1. Syed ST, Gerber BS, Sharp LK. Traveling towards disease: transportation barriers to health care access. *J Community Health* 2013;38:976–993.
