# Supplementary material
Source: PubMed Central journal article supplement (PMC6765205)
Supplement: Supp_Table-S1.pdf [file Supp_Table-S1.pdf]

SUPPLEMENTARY TABLE S1. SOCIODEMOGRAPHIC AND CLINICAL CHARACTERISTICS OF THOSE WHO ENROLLED VERSUS THOSE WHO DID NOT ENROLL

|                                     | <i>Enrolled in cohort</i><br>N = 141 | <i>Did not enroll</i><br>N = 57 |        |
|-------------------------------------|--------------------------------------|---------------------------------|--------|
|                                     | <i>% or mean (SD)</i>                | <i>% or mean (SD)</i>           | p      |
| Age                                 | 59.7 (15.1)                          | 64.2 (12.3)                     | 0.06   |
| Female                              | 64.9                                 | 60.0                            | 0.54   |
| Race/ethnicity                      |                                      |                                 | 0.63   |
| Non-Hispanic White                  | 50.4                                 | 52.2                            |        |
| Non-Hispanic Black                  | 28.4                                 | 19.6                            |        |
| Hispanic                            | 6.3                                  | 8.7                             |        |
| Asian/Multi/Other                   | 15.0                                 | 19.6                            |        |
| Education                           |                                      |                                 | 0.0002 |
| <HS Diploma                         | 12.8                                 | 31.0                            |        |
| HS Diploma or GED                   | 48.7                                 | 61.9                            |        |
| >HS Diploma                         | 38.5                                 | 7.1                             |        |
| Insurance                           |                                      |                                 | 0.14   |
| Commercial                          | 29.5                                 | 41.8                            |        |
| Medicare                            | 11.5                                 | 7.3                             |        |
| Medicaid                            | 50.4                                 | 36.4                            |        |
| Self-Pay                            | 8.6                                  | 14.6                            |        |
| Primary Language                    |                                      |                                 | 0.04   |
| English                             | 90.6                                 | 91.3                            |        |
| Spanish                             | 7.1                                  | 0.0                             |        |
| Other                               | 2.3                                  | 8.7                             |        |
| Charlson comorbidity score          | 3.60 (2.8)                           | 3.7 (2.7)                       | 0.86   |
| Body mass index                     | 31.5 (7.9)                           | 28.0 (6.3)                      | 0.02   |
| History of hypertension             | 44.7                                 | 49.1                            | 0.57   |
| History of diabetes mellitus        | 21.3                                 | 26.3                            | 0.44   |
| History of coronary heart disease   | 15.6                                 | 21.1                            | 0.36   |
| History of congestive heart failure | 5.0                                  | 10.5                            | 0.15   |
| History of depression               | 19.9                                 | 10.5                            | 0.11   |

Of those who reported health-related social needs, ‘enrolled’ represents those who enrolled in the linkage intervention, and ‘did not enroll’ represents those who chose not to participate in the intervention.

GED, general equivalency diploma; HS, high school; SD, standard deviation.
