# Supplementary material
Source: PubMed Central journal article supplement (PMC6765205)
Supplement: Supp_Table-S2.pdf [file Supp_Table-S2.pdf]

SUPPLEMENTARY TABLE S2. CHANGE IN NEEDS FROM BASELINE TO FOLLOW-UP AMONG INTERVENTION PARTICIPANTS

|                                         |                                           | <i>Follow-up food insecurity</i>                  |                |
|-----------------------------------------|-------------------------------------------|---------------------------------------------------|----------------|
|                                         |                                           | <i>Absent</i>                                     | <i>Present</i> |
| <i>Food insecurity</i>                  |                                           |                                                   |                |
|                                         | Baseline food insecurity                  | N (Row %)                                         | N (Row %)      |
|                                         | Absent                                    | 70 (86.4)                                         | 11 (13.6)      |
|                                         | Present                                   | 14 (25.5)                                         | 41 (74.6)      |
| <i>Cost-related medication underuse</i> |                                           | <i>Follow-up cost-related medication underuse</i> |                |
|                                         |                                           | <i>Absent</i>                                     | <i>Present</i> |
|                                         | Baseline cost-related medication underuse | N (Row %)                                         | N (Row %)      |
|                                         | Absent                                    | 60 (77.9)                                         | 17 (22.1)      |
|                                         | Present                                   | 24 (39.3)                                         | 37 (60.7)      |
| <i>Transportation barrier</i>           |                                           | <i>Follow-up transportation barrier</i>           |                |
|                                         |                                           | <i>Absent</i>                                     | <i>Present</i> |
|                                         | Baseline transportation barrier           | N (Row %)                                         | N (Row %)      |
|                                         | Absent                                    | 64 (87.7)                                         | 9 (12.3)       |
|                                         | Present                                   | 31 (49.2)                                         | 32 (50.8)      |

Row % indicates the percent of those with a given baseline value who had the response indicated in the column heading at follow-up. For example, of those without food insecurity at baseline, 13.6% reported food insecurity at follow-up.
